# Supplementary material for: Gemini surfactant with pyrrolidinium head groups and a hydroxyl-substituted spacer: surface properties and assisted one-pot synthesis of dendritic Au nanocrystals
Source: Royal Society of Chemistry journal article supplement (doi:10.1039/c8nj01357h), 2018-01-01
Supplement: c8nj01357h1.pdf [file c8nj01357h1.pdf]

## Supporting information

### **Gemini surfactant with pyrrolidinium head groups and hydroxyl-substituted spacer: surface property and assisted one-pot synthesis of dendritic Au nanocrystals**

Saisai Yan,<sup>ab</sup> Wanying Wei,<sup>ab</sup> Zhinong Gao,<sup>\*ab</sup> Yan Xia<sup>ab</sup> and Jia Han<sup>ab</sup>

<sup>a</sup> College of Chemistry and Molecular Sciences, Wuhan University, Wuhan 430072, Hubei, P.R. China.

<sup>b</sup> Key Laboratory of Biomedical Polymers, Ministry of Education of China, Wuhan 430072, Hubei, P.R. China.

\*Corresponding author: Zhinong Gao

E-mail: gzn@whu.edu.cn

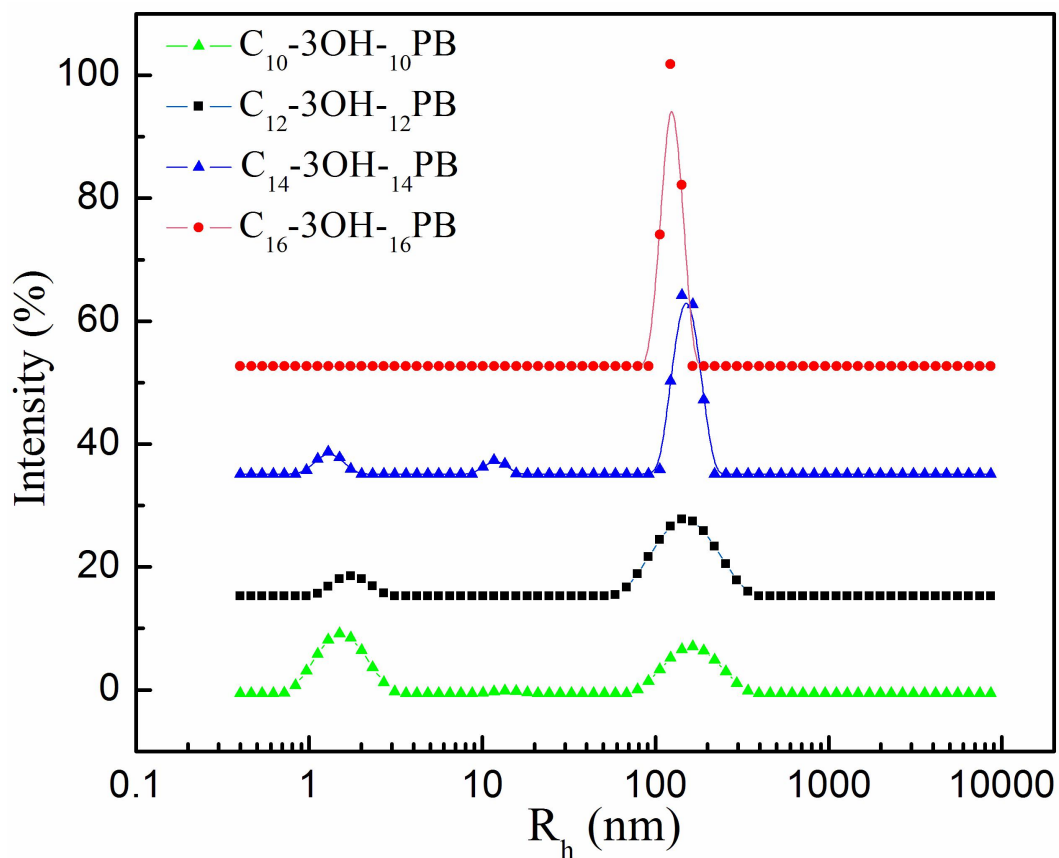

**Figure S1.** Size distribution of  $C_n$ -3OH- $n$ PB ( $n=10, 12, 14$  and  $16$ ) at 10 CMC.

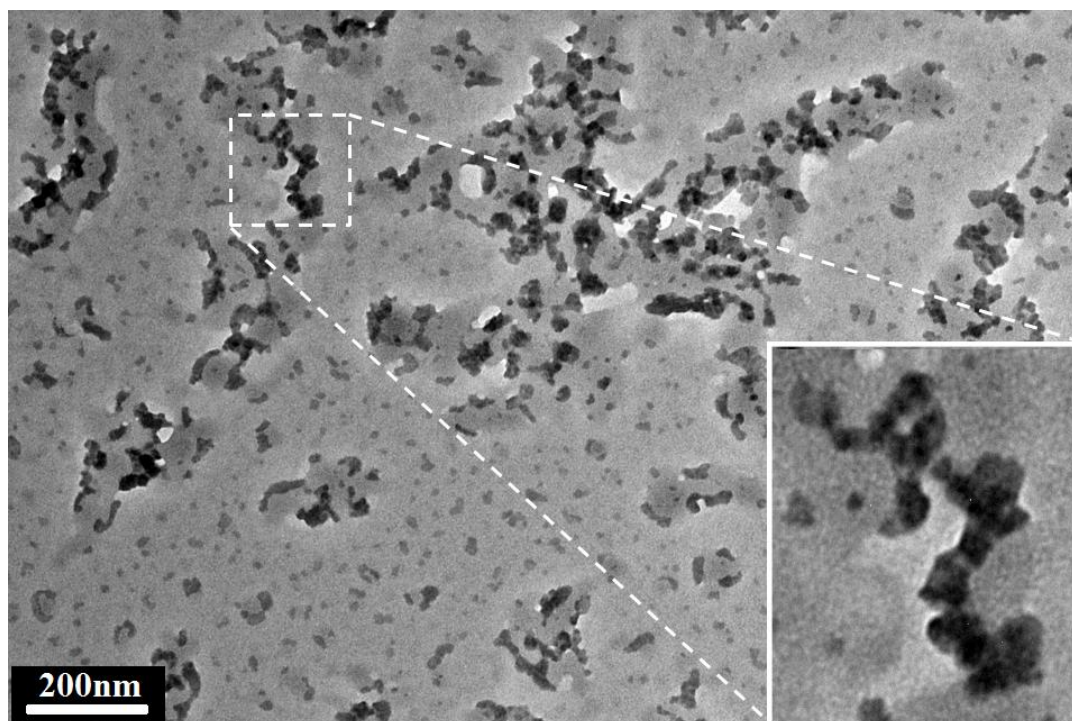

**Figure S2.** Morphology of aggregations formed by  $C_{16}$ -3OH- $16$ PB at 50 CMC.

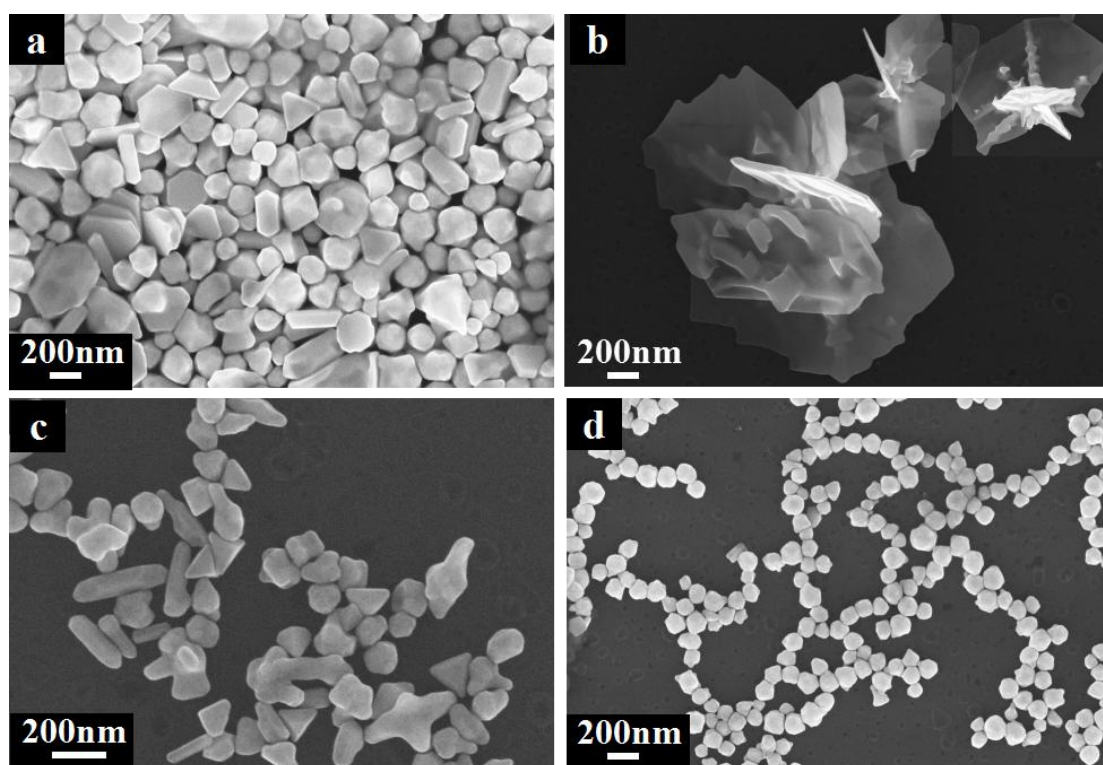

**Figure S3.** SEM images of Au nanostructures obtained under different concentration of C<sub>14</sub>-3OH-14PB: (a) 0.01 M, (b) 0.005 M, (c) 0.001 M, (d) 0.0005 M.

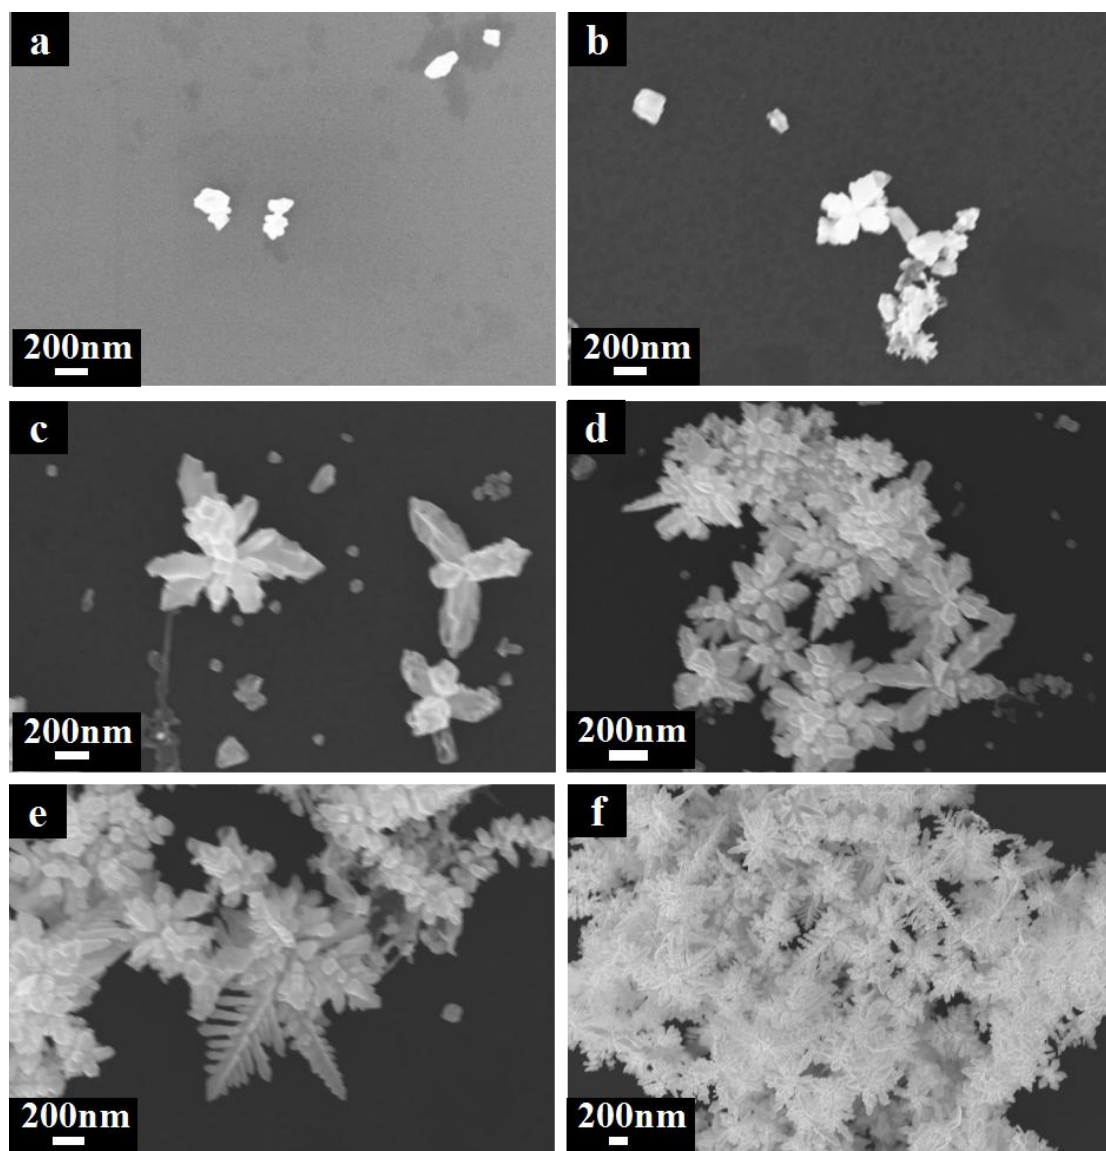

**Figure S4.** SEM images of Au nanostructures prepared from the standard procedure by adjusting the reaction time: (a) 2 min, (b) 30 min, (c) 2 h, (d) 3 h, (e) 4 h, (f) 18 h.

**Table S1.** Surface properties of  $C_n$ -3OH- $n$ PB ( $n=10, 12, 14$  and  $16$ ) determined from surface tension, conductivity and steady-state fluorescence measurements

| Gemini surfactant         | CMC <sup>a</sup> (mM) | CMC <sup>b</sup> (mM) | CMC <sup>c</sup> (mM) | $C_{20}$ (M) | $\gamma_{CMC}$ |
|---------------------------|-----------------------|-----------------------|-----------------------|--------------|----------------|
| $C_{10}$ -3OH- $_{10}$ PB | 2.450                 | 3.27                  | 2.10                  | 0.56         | 34.16          |
| $C_{12}$ -3OH- $_{12}$ PB | 0.513                 | 0.53                  | 0.56                  | 0.098        | 34.25          |
| $C_{14}$ -3OH- $_{14}$ PB | 0.081                 | 0.081                 | 0.088                 | 0.022        | 35.19          |
| $C_{16}$ -3OH- $_{16}$ PB | 0.010                 | 0.018                 | 0.010                 | 0.0035       | 40.37          |

<sup>a</sup> Surface tension measurements. <sup>b</sup> Electrical conductivity measurements. <sup>c</sup> Steady-state fluorescence measurements.

**Table S2.** The detailed experimental data and processing parameters in the experiments of different length of hydrocarbon chain.

| Gemini surfactants        | $V^a$ (mL) | HAuCl <sub>4</sub> <sup>b</sup> (mL) | AA <sup>c</sup> (mL) | Time (h) | Temperature (°C) |
|---------------------------|------------|--------------------------------------|----------------------|----------|------------------|
| C <sub>10</sub> -3OH-10PB | 4.0        | 0.2                                  | 0.4                  | 18       | 25.0             |
| C <sub>12</sub> -3OH-12PB | 4.0        | 0.2                                  | 0.4                  | 18       | 25.0             |
| C <sub>14</sub> -3OH-14PB | 4.0        | 0.2                                  | 0.4                  | 18       | 25.0             |
| C <sub>16</sub> -3OH-16PB | 4.0        | 0.2                                  | 0.4                  | 18       | 25.0             |

<sup>a</sup> The concentration of gemini surfactants used in this system was 0.02 M.

<sup>b</sup> The concentration of HAuCl<sub>4</sub> used in this system was 1.0 wt %.

<sup>c</sup> The concentration of AA used in this system was 0.1 M.

**Table S3.** The detailed experimental data and processing parameters in the experiments of different concentration of C<sub>16</sub>-3OH-16PB.

| $C^a$ (M) | $V^b$ (mL) | HAuCl <sub>4</sub> <sup>c</sup> (mL) | AA <sup>d</sup> (mL) | Time (h) | Temperature (°C) |
|-----------|------------|--------------------------------------|----------------------|----------|------------------|
| 0.0001    | 4.0        | 0.2                                  | 0.4                  | 18       | 25.0             |
| 0.0005    | 4.0        | 0.2                                  | 0.4                  | 18       | 25.0             |
| 0.0001    | 4.0        | 0.2                                  | 0.4                  | 18       | 25.0             |
| 0.01      | 4.0        | 0.2                                  | 0.4                  | 18       | 25.0             |

<sup>a</sup> The different concentration of C<sub>16</sub>-3OH-16PB.

<sup>b</sup> The volume of C<sub>16</sub>-3OH-16PB used in this system.

<sup>c</sup> The concentration of HAuCl<sub>4</sub> used in this system was 1.0 wt %.

<sup>d</sup> The concentration of AA used in this system was 0.1 M.

**Table S4.** The detailed experimental data and processing parameters in the experiments of different concentration of AA.

| C <sub>16</sub> -3OH-16PB <sup>a</sup> (mL) | HAuCl <sub>4</sub> <sup>b</sup> (mL) | C <sup>c</sup> (M) | $V^d$ (mL) | Time (h) | Temperature (°C) |
|---------------------------------------------|--------------------------------------|--------------------|------------|----------|------------------|
| 4.0                                         | 0.2                                  | 0.2                | 4.0        | 18       | 25.0             |

|     |     |     |     |    |      |
|-----|-----|-----|-----|----|------|
| 4.0 | 0.2 | 0.4 | 4.0 | 18 | 25.0 |
| 4.0 | 0.2 | 0.8 | 4.0 | 18 | 25.0 |
| 4.0 | 0.2 | 1.6 | 4.0 | 18 | 25.0 |

<sup>a</sup> The concentration of C<sub>16</sub>-3OH-<sub>16</sub>PB used in this system was 0.001 M.

<sup>b</sup> The concentration of H<sub>2</sub>AuCl<sub>4</sub> used in this system was 1.0 wt %.

<sup>c</sup> The different concentration of AA.

<sup>d</sup> The volume of AA used in this system.

**Table S5.** The detailed experimental data and processing parameters in the experiments of different concentration of H<sub>2</sub>AuCl<sub>4</sub>.

| C <sub>16</sub> -3OH- <sub>16</sub> PB <sup>a</sup><br>(mL) | AA <sup>b</sup><br>(mL) | V <sup>c</sup><br>(mL) | Temperature<br>(°C) | Time<br>(h) |
|-------------------------------------------------------------|-------------------------|------------------------|---------------------|-------------|
| 4.0                                                         | 0.4                     | 0.1                    | 25.0                | 18          |
| 4.0                                                         | 0.4                     | 0.2                    | 25.0                | 18          |
| 4.0                                                         | 0.4                     | 0.5                    | 25.0                | 18          |
| 4.0                                                         | 0.4                     | 1.0                    | 25.0                | 18          |

<sup>a</sup> The concentration of C<sub>16</sub>-3OH-<sub>16</sub>PB used in this system was 0.001 M.

<sup>b</sup> The concentration of AA used in this system was 0.4 M.

<sup>c</sup> The volume of H<sub>2</sub>AuCl<sub>4</sub> used in this system with the same concentration (1.0 wt %).

**Table S6.** The detailed experimental data and processing parameters in the experiments of different concentration of AA.

| C <sub>16</sub> -3OH- <sub>16</sub> PB <sup>a</sup><br>(mL) | H <sub>2</sub> AuCl <sub>4</sub> <sup>b</sup><br>(mL) | AA <sup>c</sup><br>(mL) | Temperature<br>(°C) | Time   |
|-------------------------------------------------------------|-------------------------------------------------------|-------------------------|---------------------|--------|
| 4.0                                                         | 0.2                                                   | 0.4                     | 25.0                | 2 min  |
| 4.0                                                         | 0.2                                                   | 0.4                     | 25.0                | 30 min |
| 4.0                                                         | 0.2                                                   | 0.4                     | 25.0                | 2 h    |
| 4.0                                                         | 0.2                                                   | 0.4                     | 25.0                | 3 h    |
| 4.0                                                         | 0.2                                                   | 0.4                     | 25.0                | 4 h    |
| 4.0                                                         | 0.2                                                   | 0.4                     | 25.0                | 18 h   |

<sup>a</sup> The concentration of C<sub>16</sub>-3OH-<sub>16</sub>PB used in this system was 0.001 M.

<sup>b</sup> The concentration of H<sub>2</sub>AuCl<sub>4</sub> used in this system was 1.0 wt %.

<sup>c</sup> The concentration of AA used in this system was 0.4 M.
